# Supplementary material for: Purification of yellow phosphorus tail gas for the removal of PH3 on the spot with flower-shaped CuO/AC
Source: Royal Society of Chemistry journal article supplement (doi:10.1039/c5ra00578g), 2015-01-01
Supplement: c5ra00578g1.pdf [file c5ra00578g1.pdf]

Table S1 The effect of PH<sub>3</sub> content on purification efficiency

| Oxygen volume<br>fraction<br>(%) | PH <sub>3</sub> content<br>before purification<br>(mg·m <sup>-3</sup> ) | PH <sub>3</sub> content<br>after purification<br>(mg·m <sup>-3</sup> ) | Purification efficiency<br>(%) |
|----------------------------------|-------------------------------------------------------------------------|------------------------------------------------------------------------|--------------------------------|
| 1.6                              | 350                                                                     | 0                                                                      | 100                            |
| 1.6                              | 550                                                                     | 0                                                                      | 100                            |
| 1.6                              | 750                                                                     | 0                                                                      | 100                            |
| 1.6                              | 900                                                                     | 0                                                                      | 100                            |

Experimental conditions: Adsorbent = flower-shaped CuO, Load capacity=19.35%, Bed height=25.5 cm, T=110 °C and GHSV=750 h<sup>-1</sup>.
